# Supplementary material
Source: publisher site journal article supplement (https://www.dovepress.com/get_supplementary_file.php?f=410891.docx)
Supplement: Supplementary file 1 [file get_supplementary_file.php]

**Table S1.** Sequences and oligonucleotides

| Gene | Forward Sequence (5′ to 3′) | Reverse Sequence (5′ to 3′) |
| --- | --- | --- |
| LINC00886 | AAGAGAAAGCCACAGGAGGGTA | CAGGTAGCAAGACAGAAGCAGAA |
| β-actin | TGACGTGGACATCCGCAAAG | CTGGAAGGTGGACAGCGAGG |
| U6 | CTCGCTTCGGCAGCACA | AACGCTTCACGAATTTGCGT |
| Si-LINC00886-1 | GGUUGAGAACAGCUGCUAUTT | AUAGCAGCUGUUCUCAACCTT |
| Si-LINC00886-2 | GGGAUAGACAUGUGACCAATT | UUGGUCACAUGUCUAUCCCTT |
| Si-LINC00886-3 | GCAGAAGAGCGUGUUCCAUTT | AUGGAACACGCUCUUCUGCTT |
| Si-NC | UUCUCCGAACGUGUCACGUTT | ACGUGACACGUUCGGAGAATT |
| RAB10 | CTGCTCCTGATCGGGGATTC | TGATGGTGTGAAATCGCTCCT |
| E2F2 | CGTCCCTGAGTTCCCAACC | GCGAAGTGTCATACCGAGTCTT |


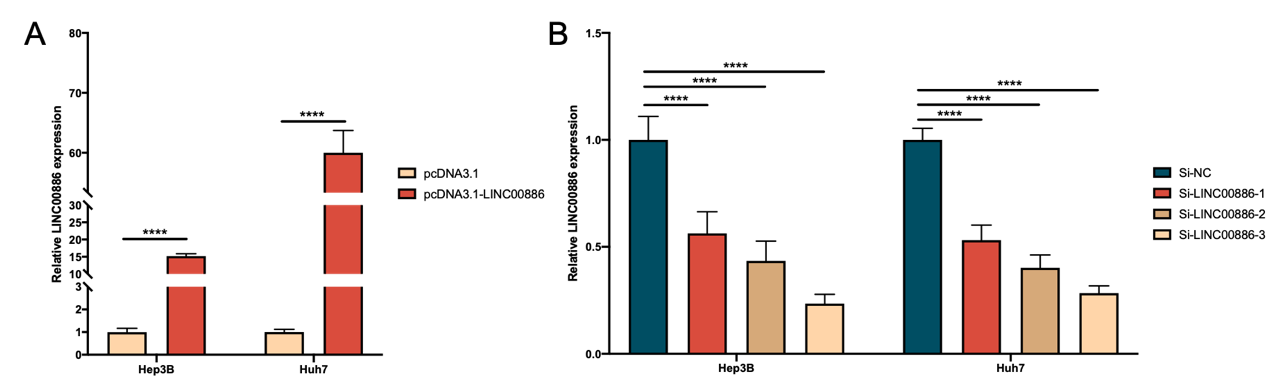


**Figure S1. The expression levels of LINC00886.** (**A** and **B**) LINC00886 expression was analyzed using qRT-PCR after transfection of Hep3B and Huh7 cells with Si-NC, Si-LINC00886, pcDNA3.1 or pcDNA3.1-LINC00886, respectively. *****P*<0.0001.


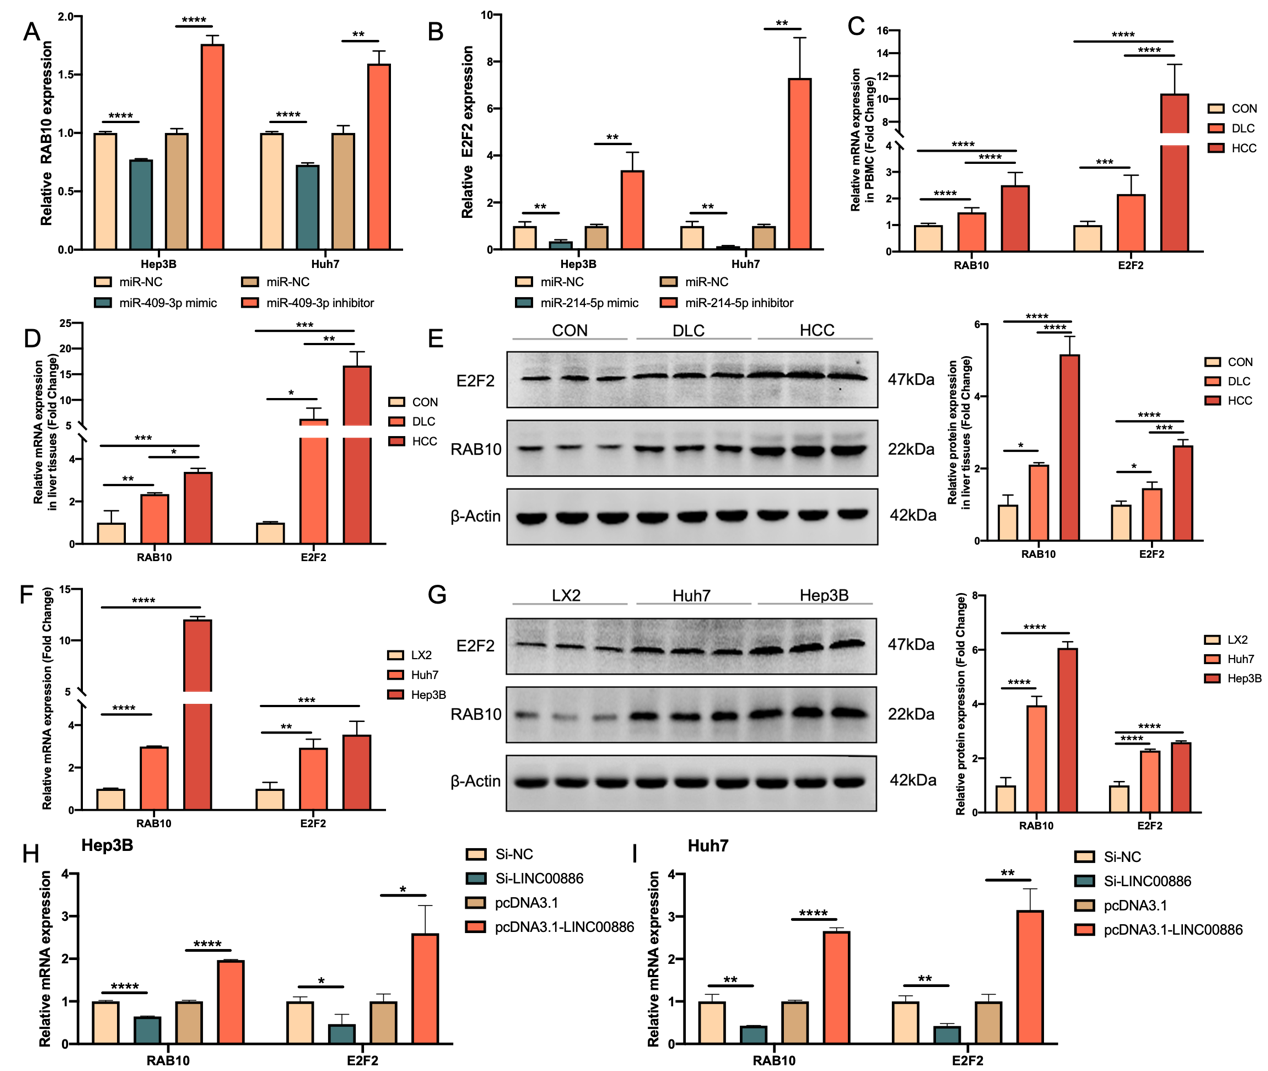


**Figure S2. The expression levels of RAB10 and E2F2.** (**A** and **B**) qRT-PCR was utilized to evaluate RAB10 (**A**) and E2F2 expression (**B**) after transfection of Hep3B and Huh7 cells with miR-NCs, miR-409-3p/miR-214-5p mimics, and miR-409-3p/miR-214-5p inhibitors, respectively. Relative RAB10 and E2F2 expression levels were detected utilizing qRT-PCR in PBMC samples (**C**, n=20 per group). qRT-PCR and Western blotting were utilized to access the mRNA and protein levels of RAB10 and E2F2 in hepatic tissues (**D** and **E**, n=5 per group) and HCC cells (**F** and **G**). (**H** and **I**) qRT-PCR was utilized to access RAB10 and E2F2 expression following HCC cell transfection of Si-NC, Si-LINC00886, pcDNA3.1 or pcDNA3.1-LINC00886, respectively. **P*<0.05, ***P*<0.01, ****P*<0.001, *****P*<0.0001. HCC, hepatocellular carcinoma; LC, liver cirrhosis; PBMC, peripheral blood mononuclear cell; qRT-PCR, quantitative reverse-transcriptase polymerase chain reaction.


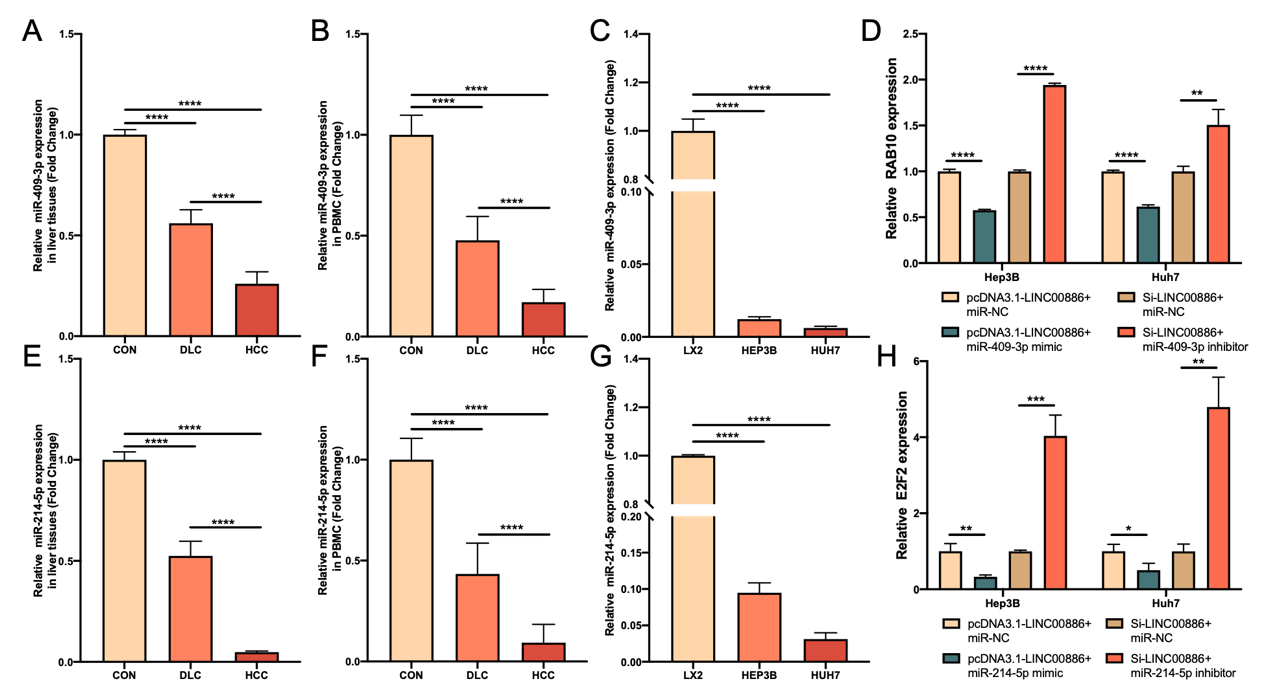


**Figure S3. The expression levels of miR-409-3p, miR-214-5p, RAB10 and E2F2.** Relative miR-409-3p expression levels were detected utilizing qRT-PCR in hepatic tissues (**A**, n=5 per group), PBMC samples (**B**, n=20 per group) and. HCC cells (**C**). (**D**) qRT-PCR was utilized to analyze RAB10 after introduction of Si-LINC00886+miR-NC, pcDNA3.1-LINC00886+miR-NC, Si-LINC00886+miR-409-3p inhibitors or pcDNA3.1-LINC00886+miR-409-3p mimics into HCC cells. Relative miR-214-5p expression levels were detected utilizing qRT-PCR in hepatic tissues (**E,** n=5 per group), PBMC samples (**F**, n=20 per group) and. HCC cells (**G**). (**H**) qRT-PCR was utilized to analyze E2F2 after introduction of Si-LINC00886+miR-NC, pcDNA3.1-LINC00886+miR-NC, Si-LINC00886+ miR-214-5p inhibitors or pcDNA3.1-LINC00886+ miR-214-5p mimics into HCC cells. **P*<0.05, ***P*<0.01, ****P*<0.001, *****P*<0.0001. HCC, hepatocellular carcinoma; LC, liver cirrhosis; PBMC, peripheral blood mononuclear cell; qRT-PCR, quantitative reverse-transcriptase polymerase chain reaction.
